# Supplementary material for: Independent and combined associations of sugar-sweetened beverage consumption, TV viewing, and physical activity with severe depressive symptoms among 59,402 adults
Source: PubMed Central journal article supplement — Braz J Psychiatry. 2020 Dec 18;43(6):574–83. doi: 10.1590/1516-4446-2020-1073 (PMC8639020; doi:10.1590/1516-4446-2020-1073), 2020-12-18
Supplement: bjp-43-06-574-s001.pdf [file bjp-43-06-574-s001.pdf]

**Table S1** Association of different indicators of sugar-sweetened beverage consumption and TV viewing with severe depressive symptoms according to sex

|                         | Men               | Women             |
|-------------------------|-------------------|-------------------|
| Number of glasses/week  |                   |                   |
| None                    | Ref               | Ref               |
| 1-5 glasses/week        | 0.80 (0.63-1.01)  | 0.92 (0.81-1.05)  |
| 6-10 glasses/week       | 0.88 (0.65-1.19)  | 1.06 (0.90-1.24)  |
| 11-15 glasses/week      | 0.75 (0.54-1.04)  | 0.96 (0.78-1.19)  |
| 16 or more glasses/week | 1.00 (0.70-1.42)  | 1.67 (1.35-2.07)* |
| TV-viewing              |                   |                   |
| < 5 h/day               | Ref               | Ref               |
| ≥ 5 h/day               | 1.59 (1.22-2.06)* | 1.27 (1.10-1.46)* |
| Weekly frequency        |                   |                   |
| 1-6 days/week           | Ref               | Ref               |
| 7 days/week             | 1.18 (0.89-1.55)  | 1.32 (1.14-1.54)* |
| TV viewing              |                   |                   |
| < 5 h/day               | Ref               | Ref               |
| ≥ 5 h/day               | 1.88 (1.39-2.54)* | 1.37 (1.06-1.53)* |
| Number of glasses/day   |                   |                   |
| 1 glass                 | Ref               | Ref               |
| 2 or more glasses       | 1.04 (0.83-1.31)  | 1.20 (1.05-1.36)* |
| TV-viewing              |                   |                   |
| < 5 h/day               | Ref               | Ref               |
| ≥ 5 h/day               | 1.86 (1.38-2.49)* | 1.29 (1.08-1.54)* |

Data presented as prevalence ratio (95% confidence interval).

Adjusted for chronological age, ethnicity, educational status, employment status, smoking, consumption of alcohol, fruit, sweets/candy, multimorbidity, and weight status.

\*  $p < 0.05$ .

**Table S2** Association of different indicators of sugar-sweetened beverage consumption and physical activity with severe depressive symptoms according to sex

|                         | Men               | Women             |
|-------------------------|-------------------|-------------------|
| Number of glasses/week  |                   |                   |
| None                    | Ref               | Ref               |
| 1-5 glasses/week        | 0.80 (0.63-1.01)  | 0.92 (0.81-1.04)  |
| 6-10 glasses/week       | 0.88 (0.65-1.20)  | 1.07 (0.91-1.25)  |
| 11-15 glasses/week      | 0.76 (0.55-1.06)  | 0.98 (0.79-1.21)  |
| 16 or more glasses/week | 1.05 (0.74-1.49)  | 1.71 (1.38-2.11)* |
| Physical activity       |                   |                   |
| Active                  | Ref               | Ref               |
| Inactive                | 2.00 (1.54-2.59)* | 1.31 (1.11-1.55)* |
| Weekly frequency        |                   |                   |
| 1-6 days/week           | Ref               | Ref               |
| 7 days/week             | 1.19 (0.91-1.57)  | 1.34 (1.16-1.56)* |
| Physical activity       |                   |                   |
| Active                  | Ref               | Ref               |
| Inactive                | 1.81 (1.35-2.43)* | 1.23 (1.01-1.56)* |
| Number of glasses/day   |                   |                   |
| 1 glass                 | Ref               | Ref               |
| 2 or more glasses       | 1.06 (0.85-1.33)  | 1.21 (1.06-1.37)* |
| Physical activity       |                   |                   |
| Active                  | Ref               | Ref               |
| Inactive                | 1.83 (1.36-2.45)* | 1.23 (1.01-1.52)* |

Data presented as prevalence ratio (95% confidence interval).

Adjusted for chronological age, ethnicity, educational status, employment status, smoking, consumption of alcohol, fruit, sweets/candy, multimorbidity, weight status.

\*  $p < 0.05$ .
